# Supplementary material for: Evolutionary and immune microenvironment dynamics during neoadjuvant treatment of oesophagael adenocarcinoma
Source: Research Square preprint supplement (doi:10.21203/rs.3.rs-2738048/v1), 2023-04-13

C1: marginal tumour cells

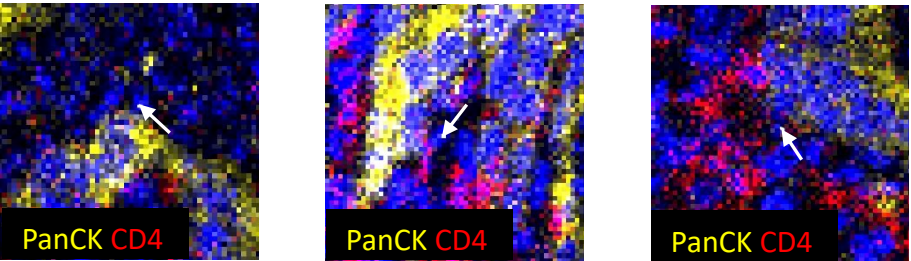

C4: tumour cells, located in direct proximity to macrophages

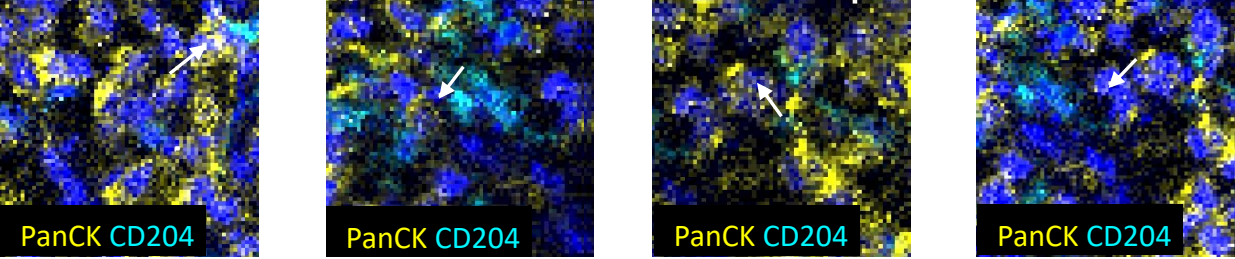

C6: marginal tumour cells

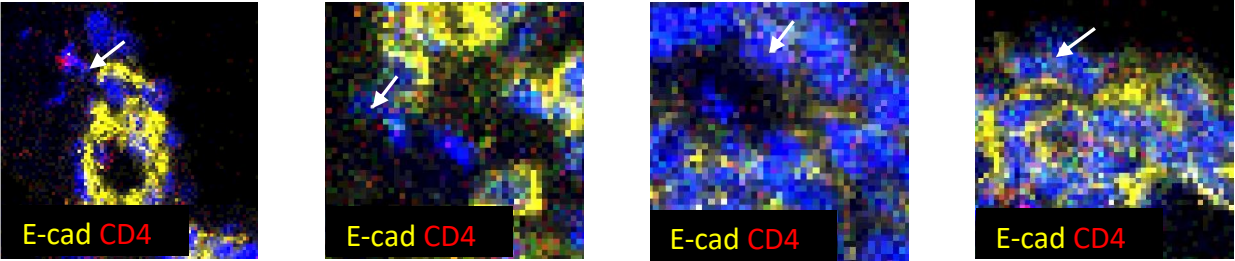

C11: CD4 and SMA cells in direct proximity to each other

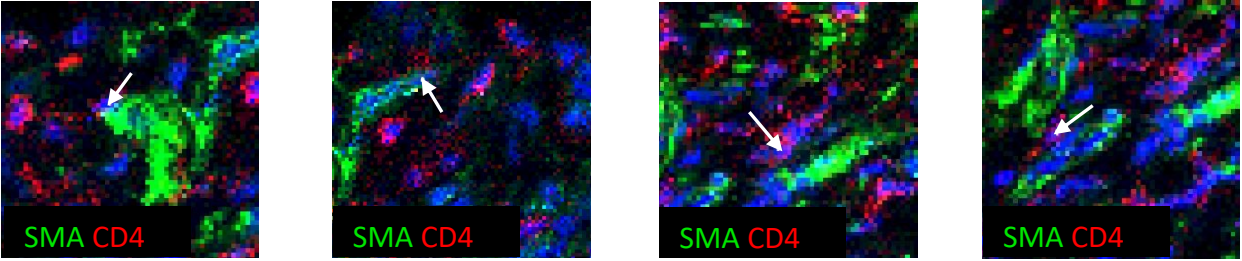

C14: CD4 and CD8 cells in direct proximity to each other

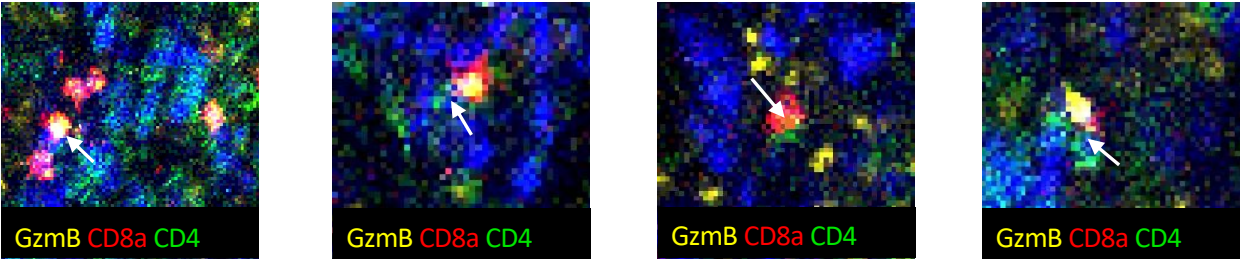

C18: tumour cells and smooth muscle cells in direct proximity to each other

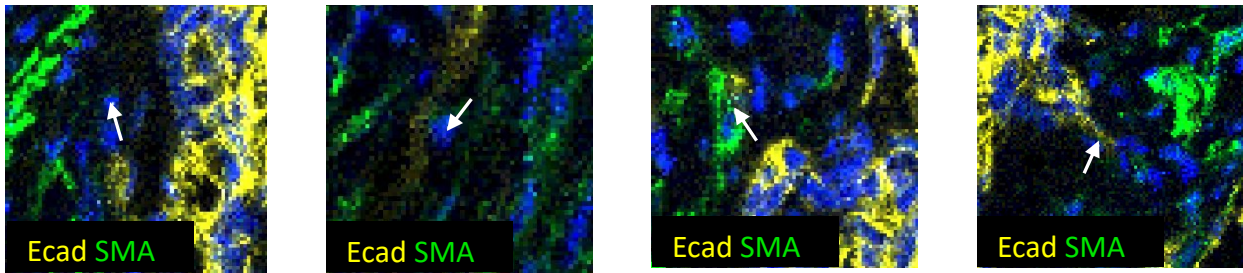

C23: immune escaped tumour cells, located in proximity to CD8 cells

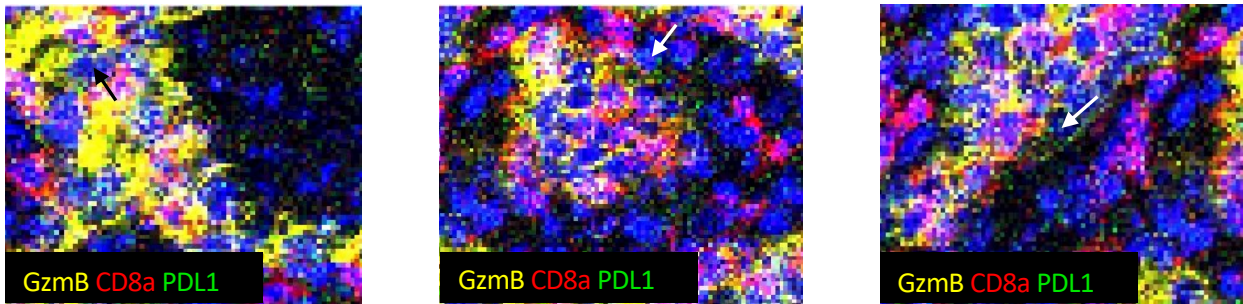

C24: macrophages located in direct proximity to CD4 cells

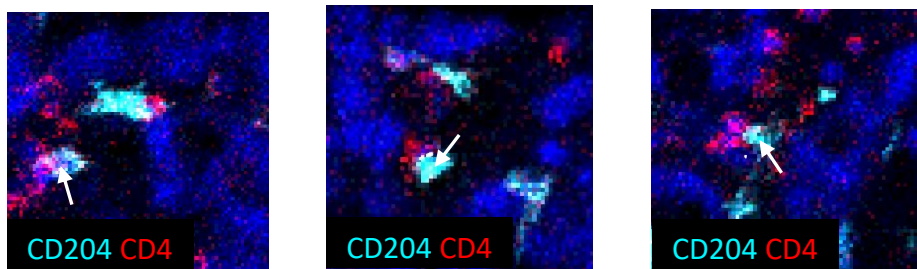

Supplement: Supplementary file 2 [file 8f6581ebfff0132efa53b895.pdf]
