# Supplementary figures and images for: Evolutionary and immune microenvironment dynamics during neoadjuvant treatment of oesophagael adenocarcinoma
Source: Research Square preprint supplement (doi:10.21203/rs.3.rs-2738048/v1), 2023-04-13

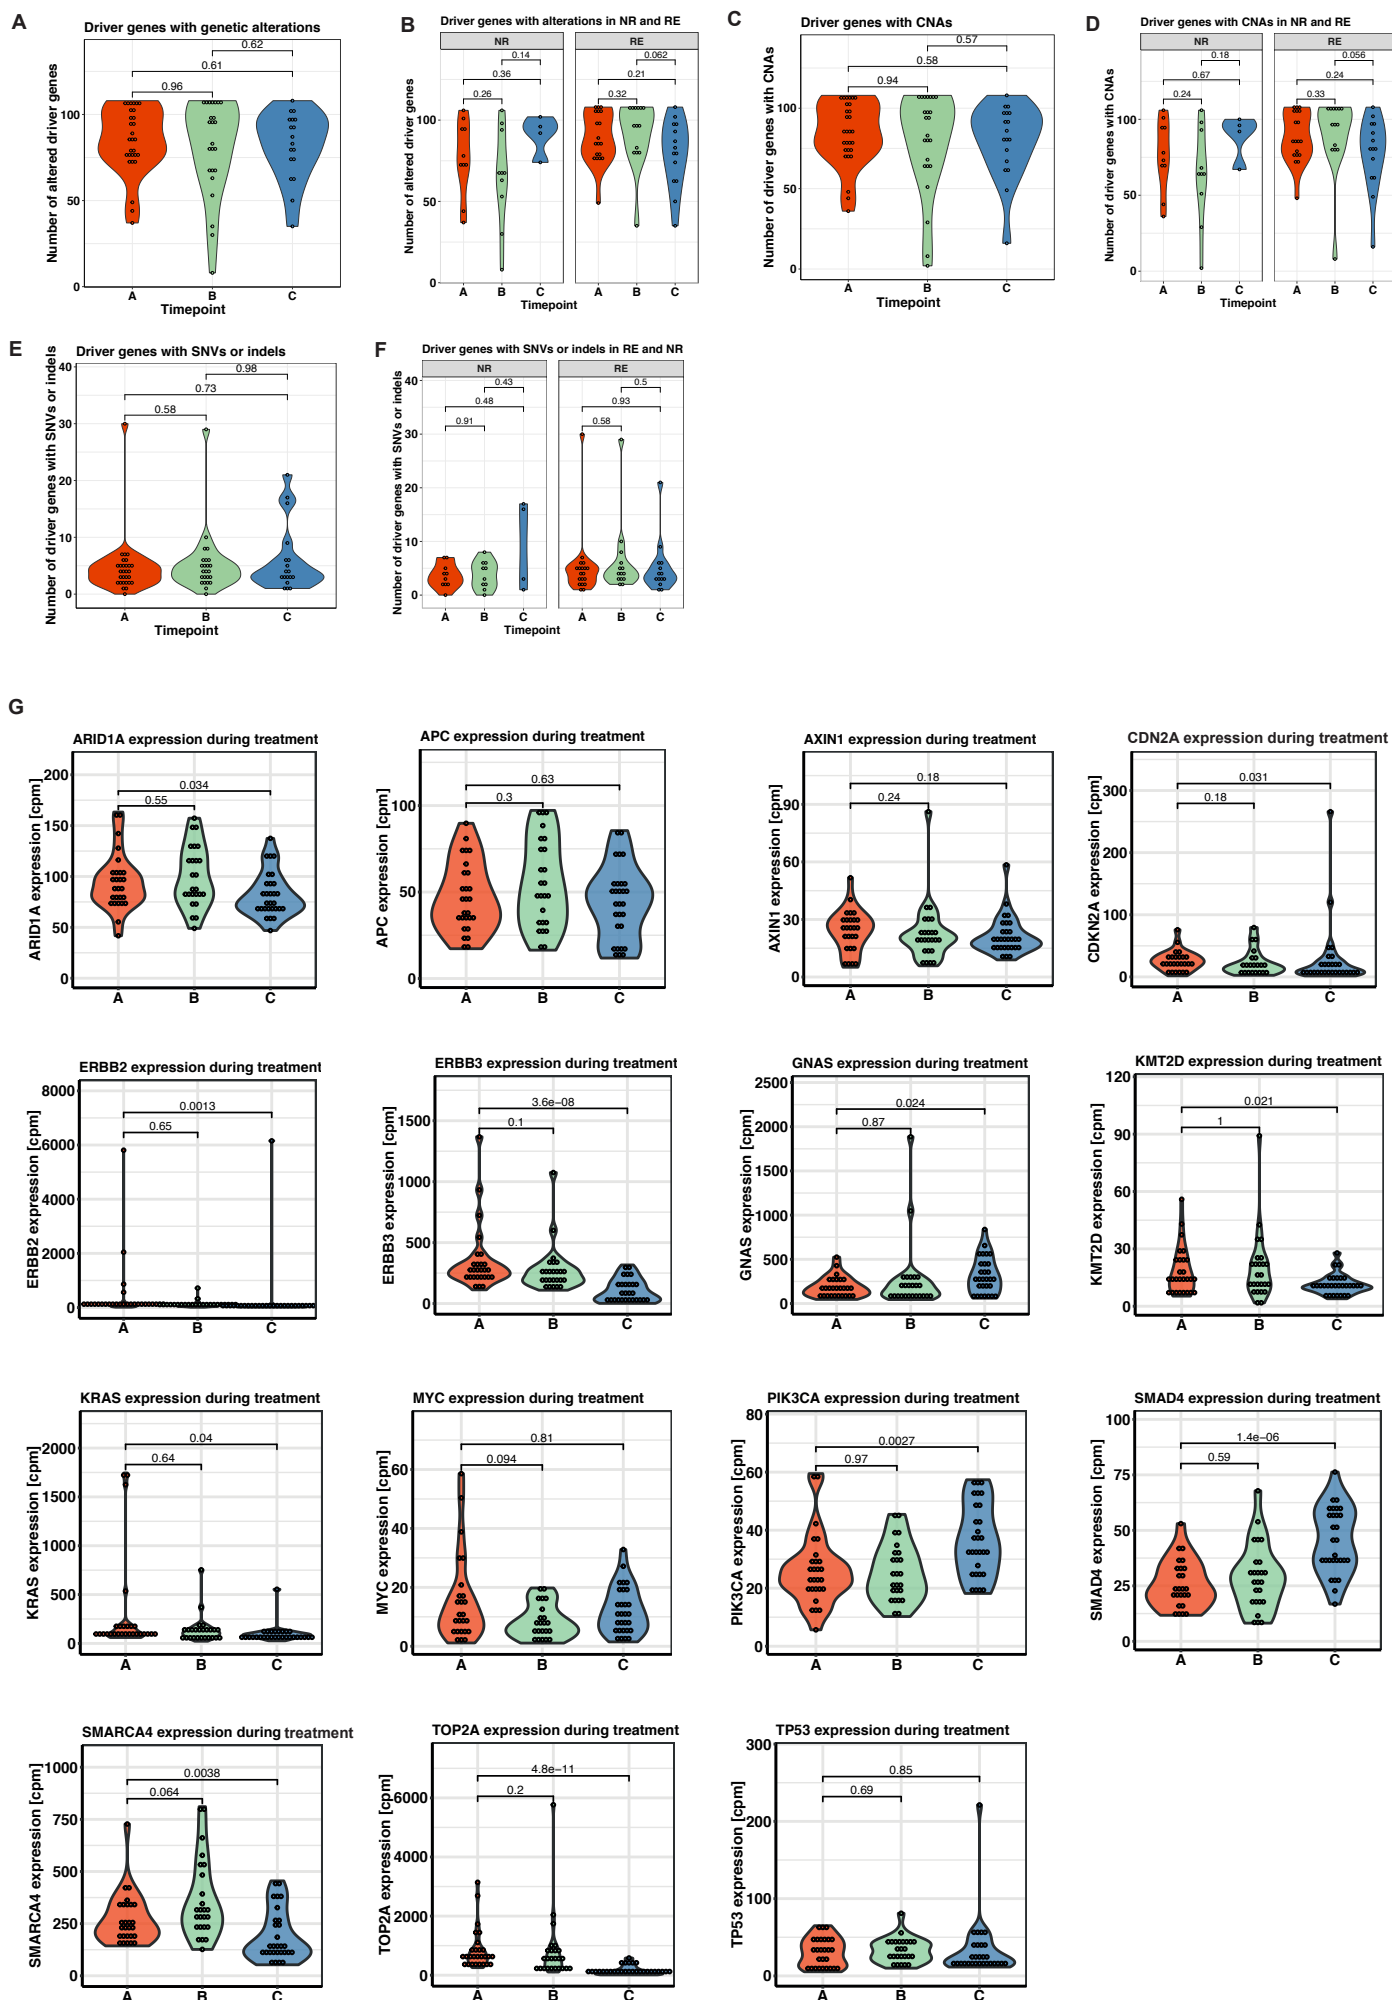

Supplement: Supplementary file 1 [file 24f74e6b9ea7659ed804af91.pdf]
